# Supplementary material for: Differences in Bacterial Community Structure on Hydrilla verticillata and Vallisneria americana in a Freshwater Spring
Source: PubMed Central journal article supplement (PMC4041241; doi:10.1264/jsme2.me13064), 2014-02-19
Supplement: 29_67_s1.pdf [file 29_67_s1.pdf]

**SUPPLEMENTARY MATERIAL**

**Gordon-Bradley *et al.*, submitted to “Microbes and Environments”**

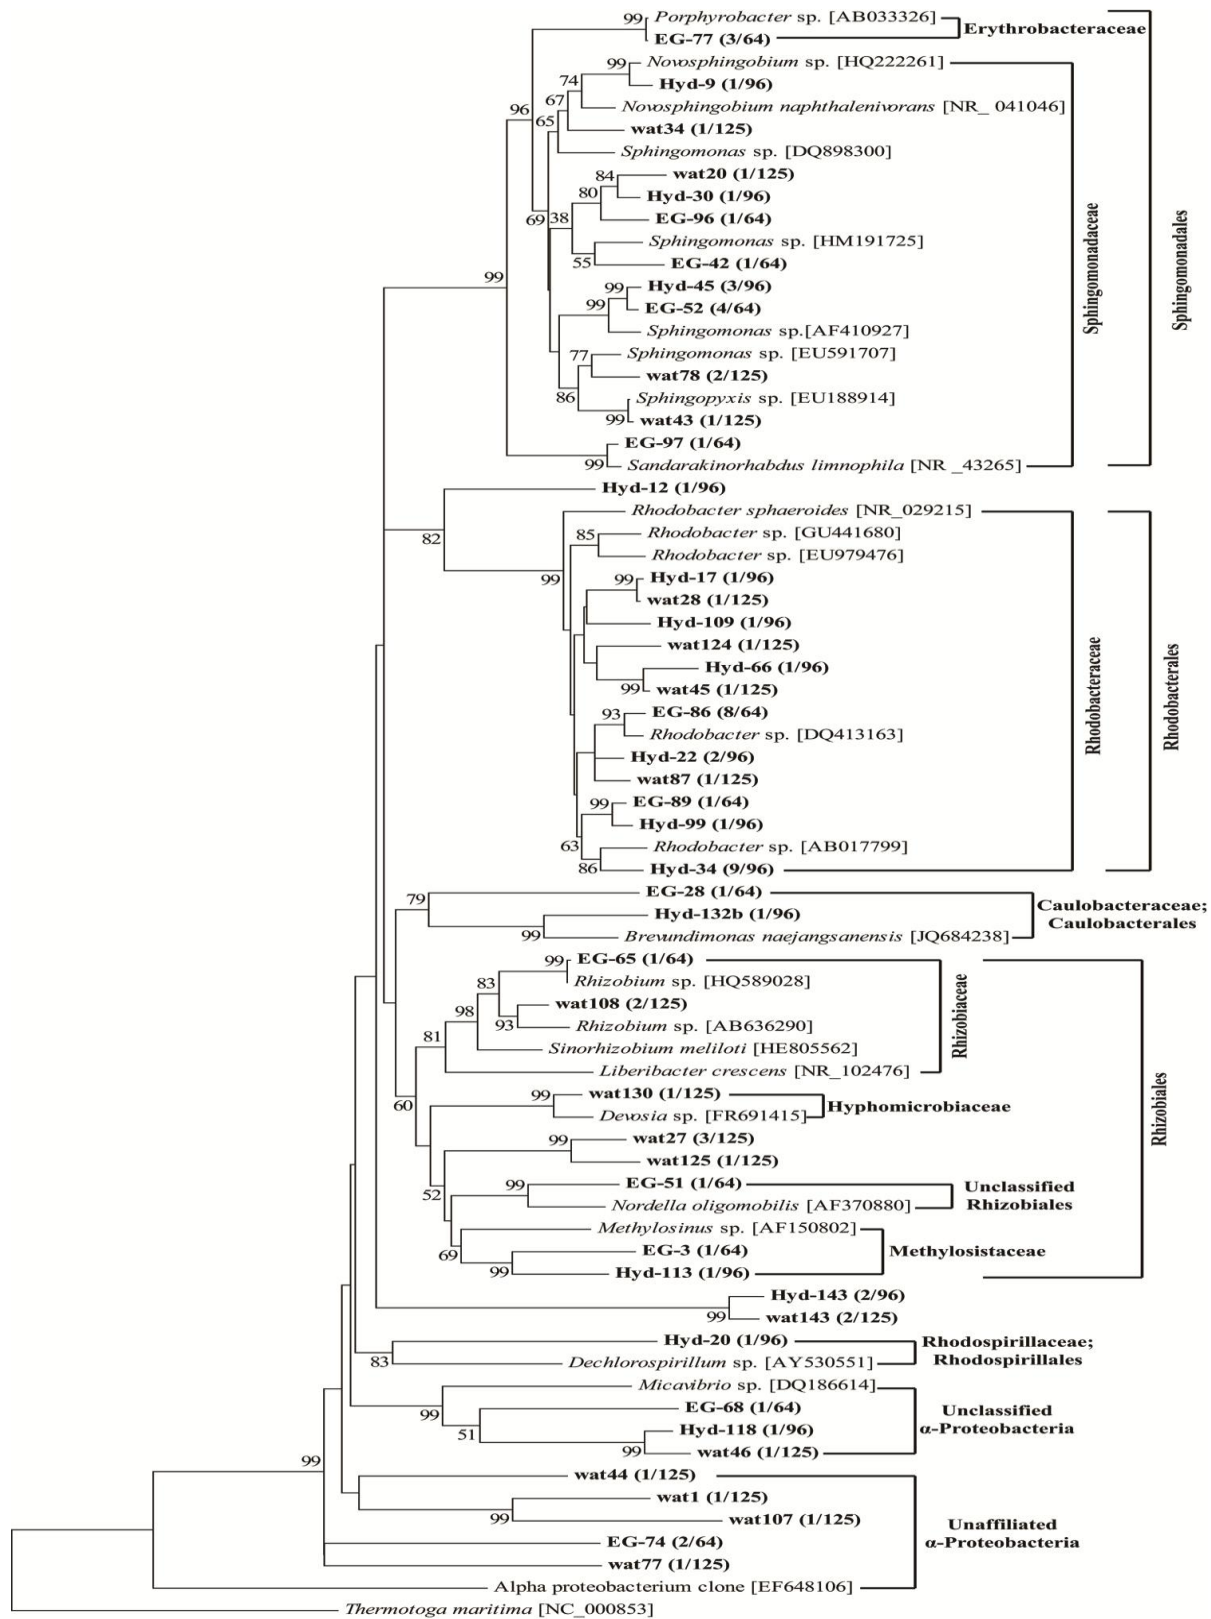

**Supplemental Figure S1** Phylogenetic tree of the PCR-amplified 16S rRNA gene (in bold) (c. 1390 bp) of the  $\alpha$ -Proteobacteria in the water column and the two plant (*Hydrilla* and eelgrass) libraries of Wakulla Spring, based on the neighbour-joining method as determined by distance Jukes-Cantor analysis. One thousand bootstrap analyses (distance) were conducted and percentages  $\geq 50\%$  is indicated at nodes. Clones (bold letters) that have  $\geq 97\%$  similar nucleic acid sequences within each sampling site are represented by a single sequence (OTU), with the number of clones out of the total in parentheses. The numbers in brackets are GenBank accession numbers. Scale bar represents 2% estimated distance

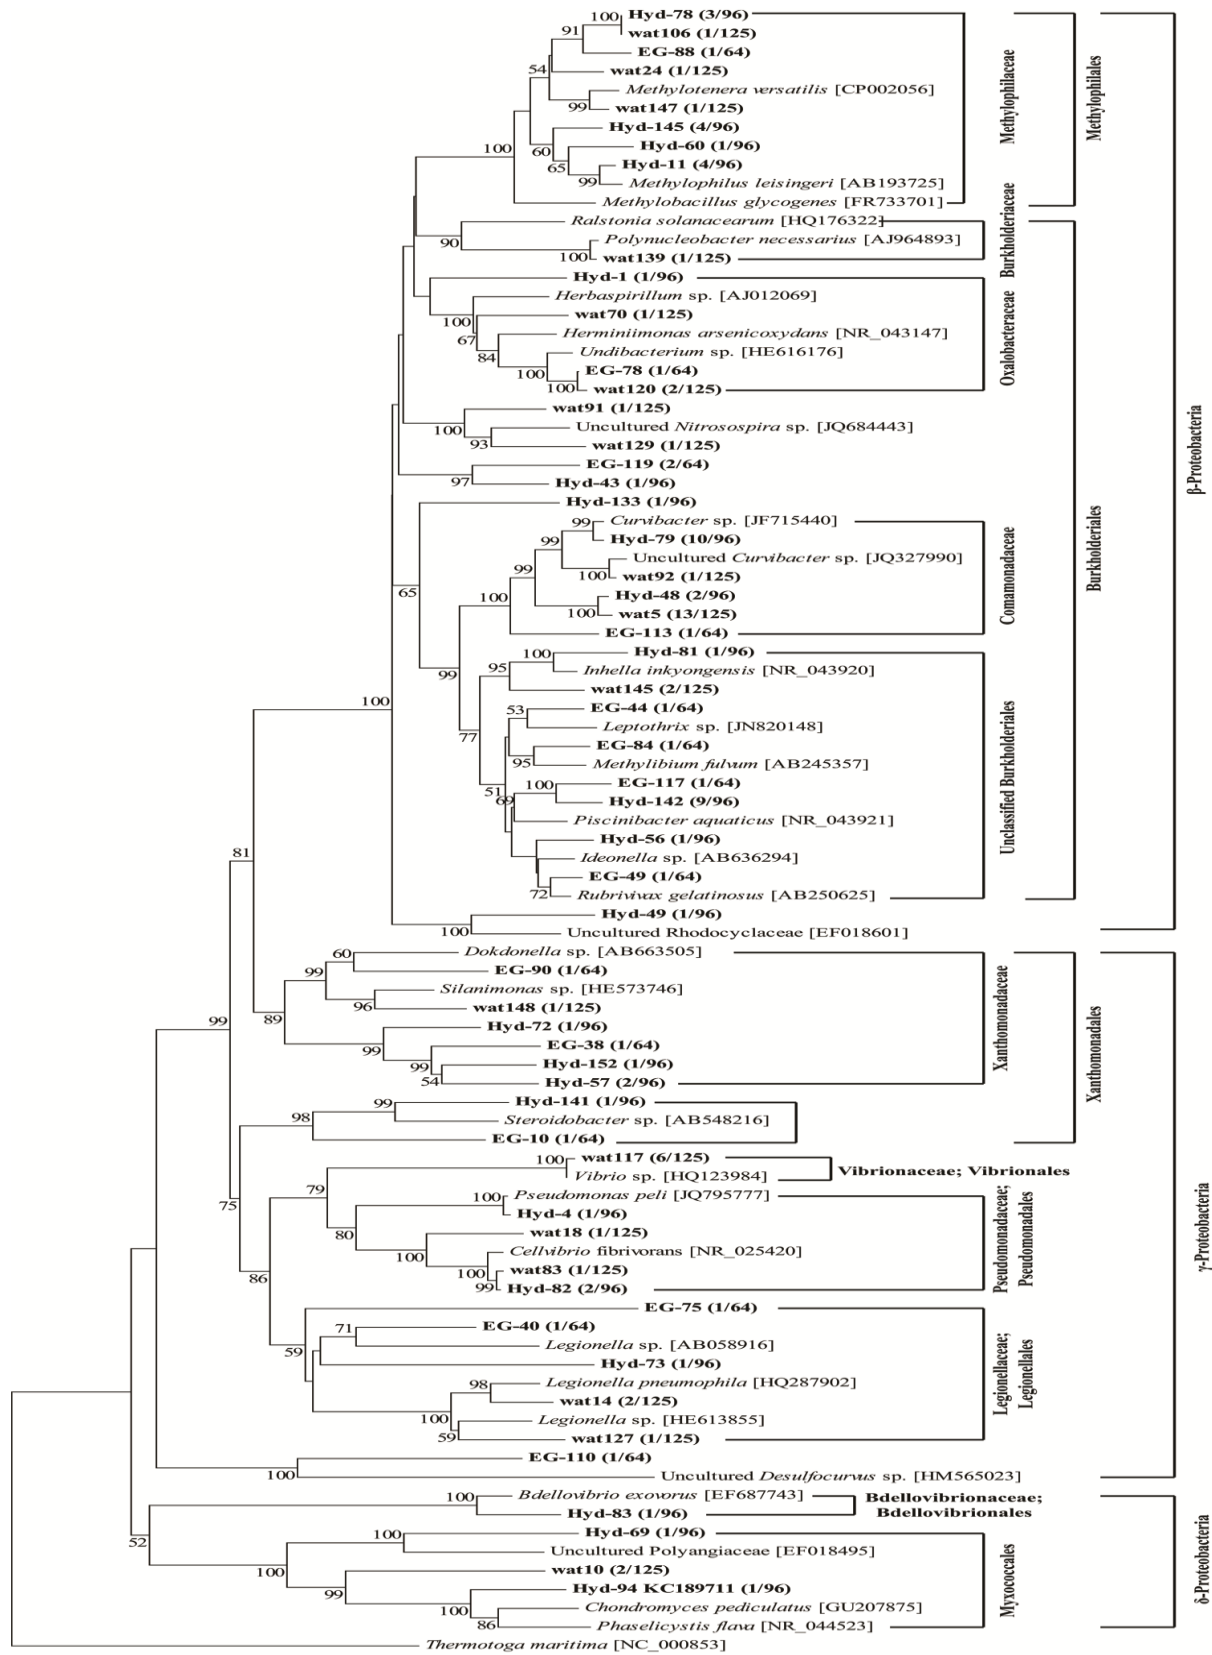

**Supplemental Figure S2** Phylogenetic tree of the PCR-amplified 16S rRNA gene OTUs (in bold) (c. 1390 bp) of the  $\beta$ -,  $\gamma$ - and  $\delta$ -Proteobacteria in the water column and the two plant (*Hydrilla* and eelgrass) libraries of Wakulla Spring, based on the neighbour-joining method as determined by distance Jukes-Cantor analysis. Numbers of identical ( $\geq 97\%$  sequence similarity) OTUs of the total number OTUs found in each station are shown in parentheses. One thousand bootstrap analyses (distance) were conducted and percentages  $\geq 50\%$  is indicated at nodes. Numbers in brackets are GenBank accession numbers. Scale bar represents 2% estimated distance.

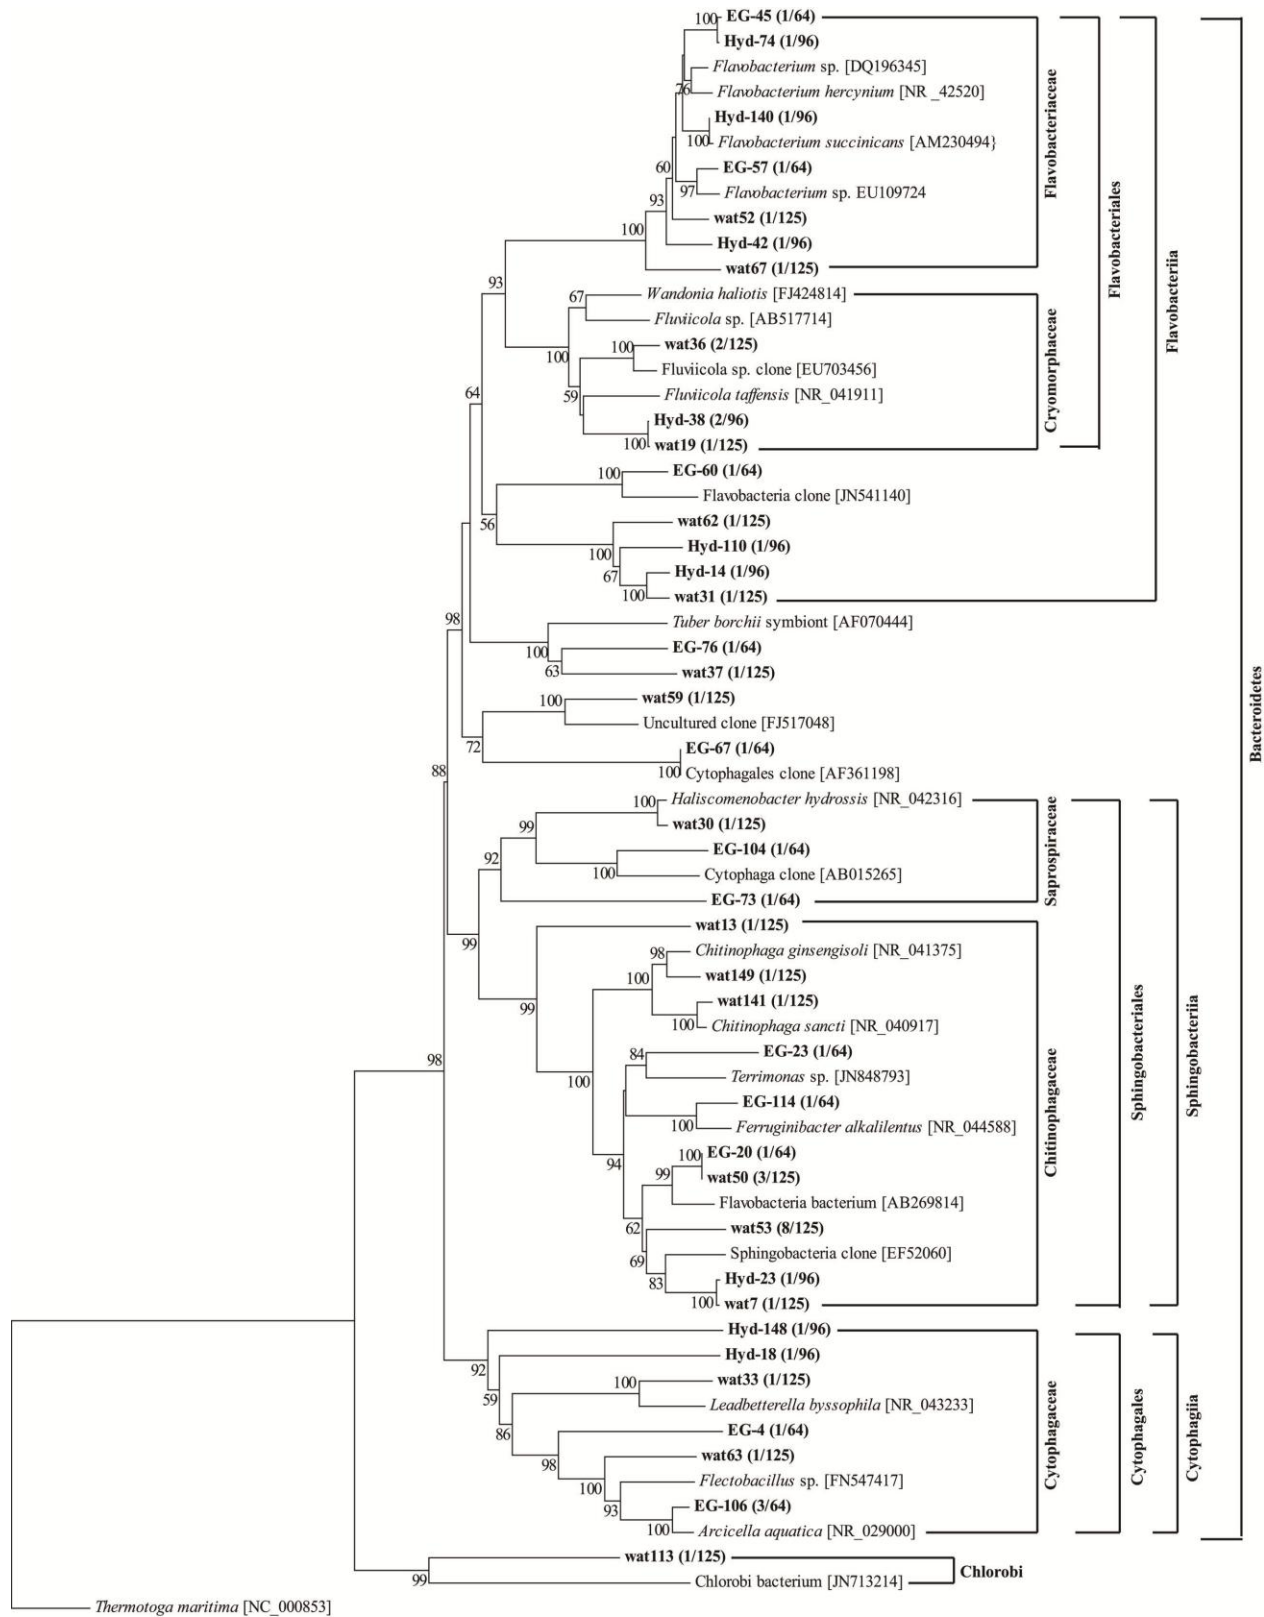

**Supplemental Figure S3** Phylogenetic tree of the PCR-amplified 16S rRNA gene OTUs (in bold) (c. 1390 bp) of the Bacteroidetes/Chlorobi group in the water column and the two plants (*Hydrilla* and eelgrass) libraries of Wakulla Spring, based on the neighbour-joining method as determined by distance Jukes-Cantor analysis. Numbers of identical ( $\geq 97\%$  sequence similarity) OTUs of the total number OTUs found in each station are shown in parentheses. One thousand bootstrap analyses (distance) were conducted and percentages  $\geq 50\%$  is indicated at nodes. Numbers in brackets are GenBank accession numbers. Scale bar represents 2% estimated distance.

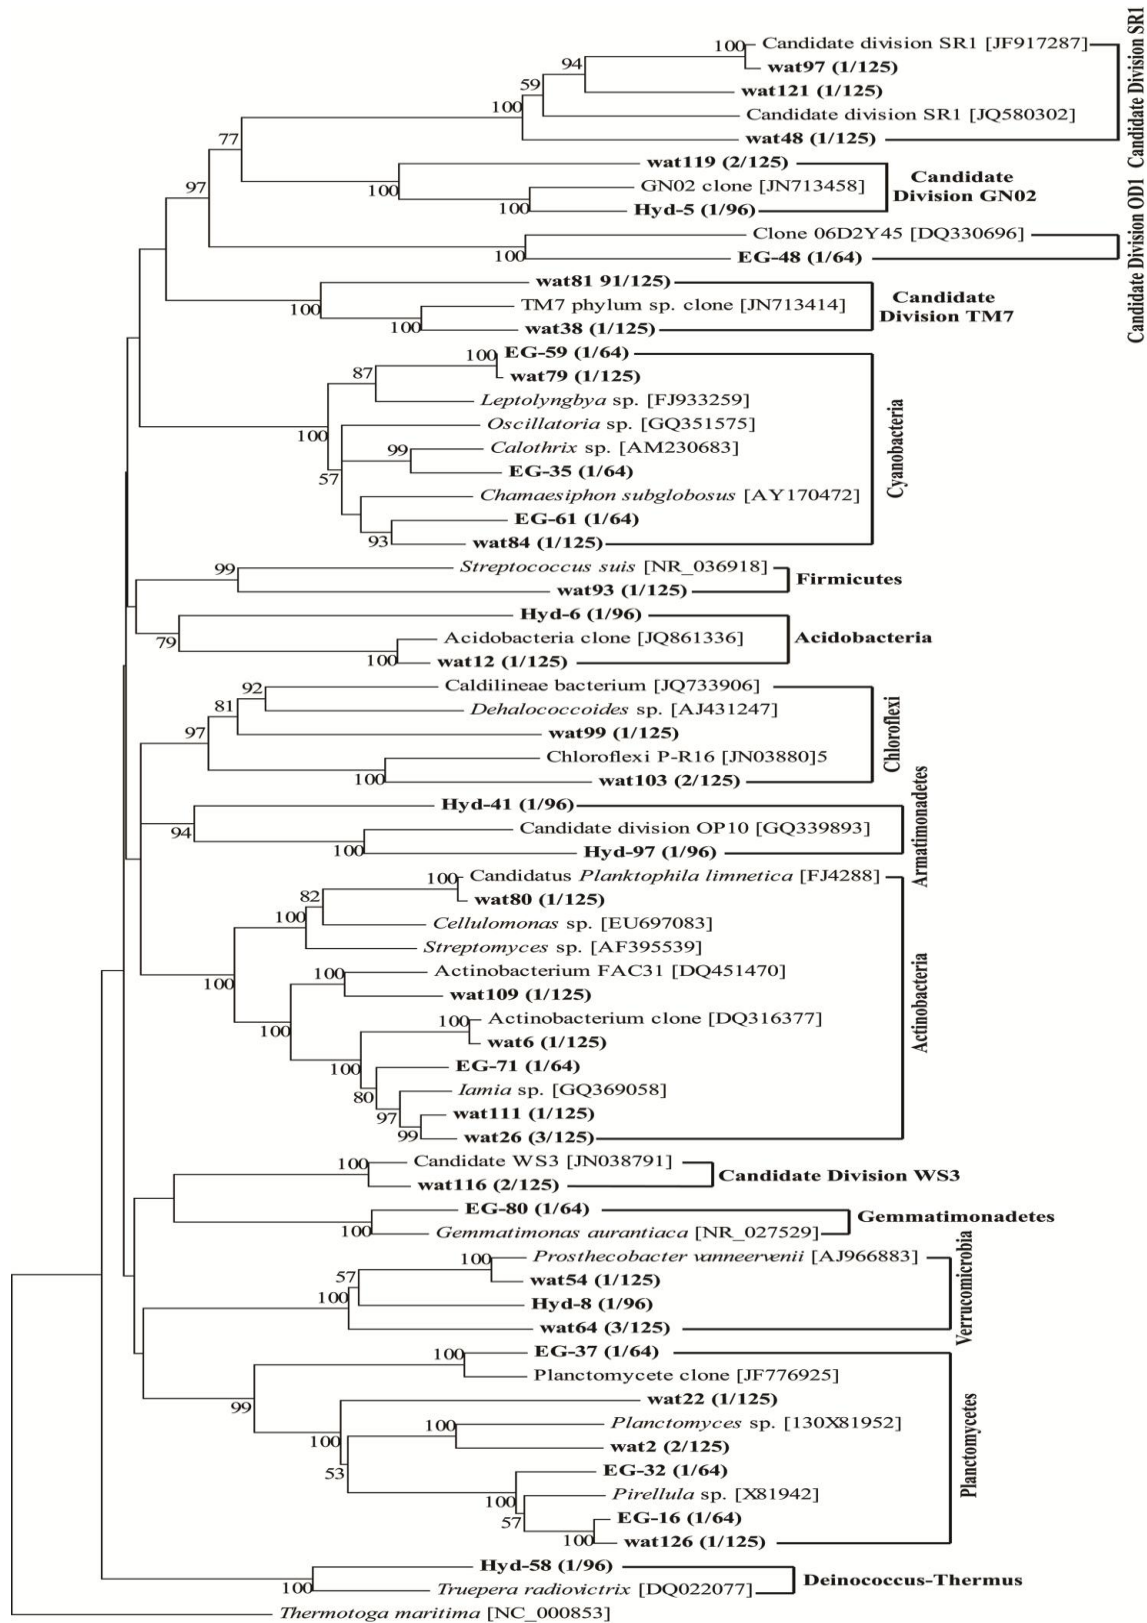

0.02



**Supplemental Figure S4** Phylogenetic tree of the PCR-amplified 16S rRNA gene OTUs (in bold) (c. 1390 bp) of the rest of the retrieved OTUs in the water column and the two plants (*Hydrilla* and eelgrass) libraries of Wakulla Spring, based on the neighbour-joining method as determined by distance Jukes-Cantor analysis. Numbers of identical ( $\geq 97\%$  sequence similarity) OTUs of the total number phlotypes found in each station are shown in parentheses. One thousand bootstrap analyses (distance) were conducted and percentages  $\geq 50\%$  is indicated at nodes. Numbers in brackets are GenBank accession numbers. Scale bar represents 2% estimated distance.

**Supplemental Table S1** Occurrence of bacterial OTUs in the water column and the two plants (*Hydrilla* and eelgrass) libraries of Wakulla Spring

| <i>Phylotype</i> | <i>No. of similar (≥97%) clones</i> | <i>Putative affiliation</i> | <i>Closest sequence (similarity) [GenBank accession No.]</i> | <i>Description</i>              | <i>Closest organism (similarity) [GenBank accession No.]</i>      |
|------------------|-------------------------------------|-----------------------------|--------------------------------------------------------------|---------------------------------|-------------------------------------------------------------------|
| EG-3             | 1                                   | Alphaproteobacteria         | Clone D10_29(95.37) [EU266798]                               | quifer sediments                | <i>Hyphomicrobium sulfonivorans</i> 25S (93.86) [AY305006]        |
| EG-4             | 1                                   | Sphingobacteriia            | Clone reservoir-75 16S (87.77) [JF697456]                    | Stream of Dianchi Lake          | <i>Flectobacillus</i> sp. WG3(87.09) [FN547417]                   |
| EG-10            | 1                                   | Gammaproteobacteria         | Clone V201-189(98.76) [HQ114204]                             | Biofilms in a vermifilter       | Uncultured<br><i>Pseudomonadales</i> Plot18-A06(94.26) [FJ889291] |
| EG-16            | 1                                   | Bacilli                     | Clone cpw3b516 (96.88) [HM921122]                            | Groundwater                     | <i>Pirellula</i> sp. Schlesner 302 (92.05) [X81942]               |
| EG-20            | 1                                   | Flavobacteriia              | Clone M17-10-B17(97.51) [JQ088393]                           | Crude oil reservoir             | <i>Flavobacterium bacterium</i> KF030 (96.05) [AB269814]          |
| EG-22            | 1                                   | Planctomycetia              | Clone HDB_SIPA613 (99.32) [HM186830]                         | Subsurface Soil                 | <i>Gemmata</i> sp. Iol-6 (92.24) [GQ889466]                       |
| EG-23            | 1                                   | Sphingobacteriia            | Clone B193(2011) (91.17) [JF830232]                          | Grass carp intestine            | <i>Terrimonas</i> sp. YJ03 (91.07) [JN848793]                     |
| EG-28            | 1                                   | Alphaproteobacteria         | Clone Dianchi-17 (98.07) [HQ324864]                          | Lake water                      | <i>Pleomorphomonas oryzae</i> F-4 (89.08) [AB159681]              |
| EG-32            | 1                                   | Planctomycetia              | Clone T-29(95.99) [HQ661341]                                 | Tingxi freshwater reservoir     | <i>Pirellula</i> sp. Schlesner 302 (92.79) [X81942]               |
| EG-35            | 1                                   | Cyanobacteria               | Clone Rivularia sp. MU24 UAM-305 (92.41) [EU009149]          | Rock surface                    | <i>Calothrix</i> sp. BECID33 (92.49) [AM230683]                   |
| EG-37            | 1                                   | Planctomycetia              | Clone Alchichica_AQ2_1_1B_09 (97.02) [JN825597]              | Microbialites in aquarium       | Uncultured planctomycete QZ-J25 (93.52) [JF776925]                |
| EG-38            | 1                                   | Gammaproteobacteria         | Clone 2\SC\46 (94.55) [EU340183]                             | Aquatic macrophytes             | <i>Dokdonella</i> sp. TSY06 (90.12) [AB663505]                    |
| EG-40            | 1                                   | Gammaproteobacteria         | Clone JH-WH38 (98.80) [EF492925]                             | Soil                            | <i>Legionella</i> sp. OA32 (91.44) [AB058916]                     |
| EG-42            | 1                                   | Alphaproteobacteria         | Clone 3BR-10BB (96.62) [EU937905]                            | Riparian iron oxidizing biofilm | <i>Sphingomonas</i> sp. SH (95.37) [HM191725]                     |
| EG-44            | 1                                   | Betaproteobacteria          | Clone Leptothrix mobilis Feox-1 (96.78) [NR_026333]          |                                 | <i>Leptothrix</i> sp. G6 (2012) (96.50) [JN820148]                |
| EG-45            | 1                                   | Flavobacteriia              | Clone 3C003394 (97.56) [EU802008]                            | Chesapeake Bay, MD              | <i>Flavobacterium</i> sp. MSY2 (97.16) [DQ196345]                 |
| EG-48            | 1                                   | Unaffiliated                | Clone MAT-CR-P3-G08 (83.51) [EU246116]                       | Hypersaline microbial mat       | Uncultured candidate 06D2Y45 (84.61) [DQ330696]                   |
| EG-49            | 1                                   | Betaproteobacteria          | Clone ambient_uncontrolled-48 (98.79) [GU454909]             | Anaerobic fermentation reactor  | <i>Ideonella</i> sp. NS1203 (97.85) [AB636294]                    |
| EG-51            | 1                                   | Alphaproteobacteria         | Clone Fr1-9 (98.07) [GU208455]                               | Dongping Lake sediment          | <i>Nordella oligomobilis</i> (92.81) [AF370880]                   |
| EG-52            | 4                                   | Alphaproteobacteria         | Clone ZWB4-16 (99.59) [FJ801213]                             | Zoige Alpine                    | <i>Sphingomonas</i> sp. B18                                       |

|       |   |                     |                                       |                                    |                                                          |
|-------|---|---------------------|---------------------------------------|------------------------------------|----------------------------------------------------------|
|       |   |                     |                                       | Wetland                            | (97.45) [AF410927]                                       |
| EG-57 | 1 | Flavobacteriia      | Clone MA-R15 (97.76) [JN038598]       | Chongxi wetland soil               | Flavobacterium sp. H7 (97.23) [EU109724]                 |
| EG-59 | 1 | Cyanobacteria       | Clone LI06st1 (98.62) [JF733399]      | Genomic DNA                        | Leptolyngbya sp. FYG (92.84) [FJ933259]                  |
| EG-60 | 1 | Flavobacteriia      | Clone ASB38 (97.44) [FJ947136]        | Activated sludge                   | Uncultured Flavobacteria CSC8 (94.36) [JN541140]         |
| EG-61 | 1 | Cyanobacteria       | Clone EpiUMA6 (91.19) [FJ849244]      | Arctic stream epilithon            | Chamaesiphon subglobosus PCC 7430 (89.82) [AY170472]     |
| EG-65 | 1 | Alphaproteobacteria | Bacterium NTL215 (99.93) [JQ779044]   | Phyllosphere                       | Rhizobium sp. PRNB-25 (99.93) [HQ589028]                 |
| EG-67 | 1 | Cytophagia          | Clone cuticle 2.39 (99.45) [HQ111173] | Embryonic stages                   | Uncultured Cytophagales 17 (99.15) [AF361198]            |
| EG-68 | 1 | Alphaproteobacteria | Clone 3.29h71 (95.85) [JN679095]      | Membrane bioreactor                | Micavibrio sp. EPC2 (88.99) [DQ186614]                   |
| EG-71 | 1 | Actinobacteria      | Clone AK4DE1_06E (93.35) [GQ397040]   | Soil                               | Iamia sp. T2-YC6790 (92.18) [GQ369058]                   |
| EG-73 | 1 | Sphingobacteriia    | Clone 46-2_3 (93.95) [FJ517715]       | Epithelium                         | Haliscomenobacter hydrossis DSM 1100 (84.19) [NR_042316] |
| EG-74 | 2 | Alphaproteobacteria | Clone DP7.3.17 (87.08) [FJ612212]     | Lake water                         | Ochrobactrum sp. TK14 (86.29) [AJ550273]                 |
| EG-75 | 1 | Gammaproteobacteria | Clone HglFeb0118m2 (88.84) [JX016688] | Marine bulk water                  | Saccharophagus sp. Myt-1 (86.27) [AB566414]              |
| EG-76 | 1 | Unaffiliated        | Clone 654995 (88.62) [DQ404664]       | Contaminated sediment              | Tuber borchii symbiont b-17BO (88.45) [AF070444]         |
| EG-77 | 3 | Alphaproteobacteria | Clone 6-53 (99.86) [JQ923713]         | Drinking water distribution system | Porphyrobacter sp. KK351 (99.79) [AB033326]              |
| EG-78 | 1 | Betaproteobacteria  | Clone 6'-72 (99.60) [JQ923814]        | Drinking water distribution system | Herbaspirillum sp. CHNTR44 (95.46) [DQ337592]            |
| EG-80 | 1 | Gemmatimonadetes    | Clone Kas174B (96.70) [EF203205]      | Sediment                           | Gemmatimonas aurantiaca T-27 (95.45) [NR_027529]         |
| EG-84 | 1 | Gammaproteobacteria | Clone BJGMM-t-217 (97.39) [JQ801240]  | Soil                               | Methylbium fulvum Gsoil 328 (96.97) [AB245357]           |
| EG-86 | 8 | Alphaproteobacteria | Clone Chun-s-2 (97.90) [EF632760]     | Freshwater sediment                | Rhodobacter sp. EMB 174 (97.91) [DQ413163]               |
| EG-88 | 1 | Betaproteobacteria  | Clone MACA-EFT44 (97.39) [GQ500809]   | Cave stream                        | Uncultured Methylothera sp. sh-xj122 (95.66) [JQ327997]  |
| EG-89 | 1 | Alphaproteobacteria | Clone 14-95 (99.15) [JF697347]        | Stream of Dianchi Lake             | Rhodobacter sp. TCRI (97.06) [AB017799]                  |
| EG-90 | 1 | Gammaproteobacteria | Clone JN11 (98.74) [JN868991]         | Lake water                         | Dokdonella fugitiva type A3T (92.93) [AJ969432]          |
| EG-96 | 1 | Alphaproteobacteria | Clone SN101 (95.99) [JQ824989]        | Saline-alkali soil                 | Sphingomonas sp. MTR-71 (95.36) [DQ898300]               |
| EG-97 | 1 | Alphaproteobacteria | Clone 6-45 (99.10) [JQ923705]         | Drinking water distribution system | Sandarakinorhabdus limnophila so42 (99.18) [NR_043265]   |

|        |   |                     |                                                            |                                              |                                                           |
|--------|---|---------------------|------------------------------------------------------------|----------------------------------------------|-----------------------------------------------------------|
| EG-104 | 1 | Cytophagia          | Uncultured Verrucomicrobia OTU-1_PBA (93.91) [JN981899]    | Aerosols from orbal oxidation ditch          | Uncultured Cytophaga sp. JTB251 (91.23) [AB015265]        |
| EG-106 | 3 | Sphingobacteriia    | Uncultured Sphingobacteriales Holab_1.7 (97.47) [EF667893] | Epithelium                                   | Arcicella aquatica NO-502 (97.51) [NR_029000]             |
| EG-110 | 1 | Deltaproteobacteria | Clone BN1 (88.88) [HQ190262]                               | Zhongyuan oil field                          | Uncultured Desulfocurvus sp. H-169 (85.63) [HM565023]     |
| EG-113 | 1 | Betaproteobacteria  | Clone 61 (99.13) [FJ623322]                                | Aerobic sequencing batch reactor             | Hydrogenophaga sp. AH-24 (98.79) [AB300163]               |
| EG-114 | 1 | Sphingobacteriia    | Clone KWK6S.61 (95.91) [JN656817]                          | Thaw pond                                    | Ferruginibacter alkalilentus HU1-GD23 (95.86) [NR_044588] |
| EG-117 | 1 | Betaproteobacteria  | Clone Q7346-HYSA (95.50) [JN391845]                        | Sludge in anoxic tank                        | Rubrivivax gelatinosus TUT3906 (95.11) [AB250625]         |
| EG-119 | 2 | Betaproteobacteria  | Clone 3.29h30 (93.68) [JN679082]                           | Membrane bioreactor                          | Ralstonia solanacearum LYP (90.87) [HQ176322]             |
| Hyd-1  | 1 | Betaproteobacteria  | Clone 2C229148 (95.06) [EU800906]                          | Delaware Bay, NJ                             | Herbaspirillum sp. G8A1 (92.75) [AJ012069]                |
| Hyd-4  | 1 | Gammaproteobacteria | Clone 6'-12 (99.80) [JQ923767]                             | Drinking water distribution system           | Pseudomonas peli M-T-TSA_17 (99.58) [JQ795777]            |
| Hyd-5  | 1 | Unaffiliated        | Clone ZR106 (90.95) [JN713458]                             | Oral cavity subgingival plaque               | Amphiprora paludosa C52 (73.71) [FJ002240]                |
| Hyd-6  | 1 | Alphaproteobacteria | Clone GOM WB10-31 (84.86) [GQ250609]                       | Sea water column in Gulf of Mexico           | Methylosinus sp. PW1 (80.84) [AF150802]                   |
| Hyd-8  | 1 | Verrucomicrobiae    | Clone C2A (96.59) [DQ856525]                               | Intestinal microflora in Chinese mitten crab | Uncultured Verrucomicrobiaceae B07-05G (95.36) [FJ543030] |
| Hyd-9  | 1 | Alphaproteobacteria | Sphingomonas sp. YT0136 (98.76) [AB362778]                 | Genomic DNA                                  | Novosphingobium sp. Van61 (97.72) [HQ222277]              |
| Hyd-11 | 4 | Betaproteobacteria  | Clone MSB19A (98.74) [DQ069200]                            | SA Au mine                                   | Methylophilus leisingeri (98.13) [AB193725]               |
| Hyd-12 | 1 | Alphaproteobacteria | Clone MACA-OC42 (91.52) [GQ500891]                         | Cave stream                                  | Sphingomonas sp. MTR-71 (91.41) [DQ898300]                |
| Hyd-14 | 1 | Flavobacteriia      | Clone OTU-30-AW (93.42) [JQ624271]                         | Wastewater treatment plant                   | Wandonia haliotis Haldis-1 (85.04) [FJ424814]             |
| Hyd-17 | 1 | Alphaproteobacteria | Clone C20 (96.08) [JQ323113]                               | Cooling water system                         | Rhodobacter sp. TCRI 14 (94.84) [AB017799]                |
| Hyd-18 | 1 | Sphingobacteriia    | Clone SM1C08 (91.67) [AF445665]                            | Genomic DNA                                  | Algoriphagus sp. KJF5-15 (83.59) [JQ800092]               |
| Hyd-20 | 1 | Alphaproteobacteria | Clone B1NR70D6 (97.43) [AY957891]                          | Drinking water biofilm                       | Dechlorospirillum sp. DB (86.41) [AY530551]               |
| Hyd-22 | 2 | Alphaproteobacteria | Clone FGL7S_B42 (97.76) [FJ437987]                         | Green Lake surface sediments                 | Rhodobacter sp. EMB 174 (97.91) [DQ413163]                |

|        |   |                            |                                                   |                                        |                                                                           |
|--------|---|----------------------------|---------------------------------------------------|----------------------------------------|---------------------------------------------------------------------------|
| Hyd-23 | 1 | <i>Sphingobacteriia</i>    | Clone ZBAF-R4 (94.18) [HQ011389]                  | Biofilm in a wastewater treatment      | Uncultured Bacteroidetes SW11 (94.07) [AJ575719]                          |
| Hyd-30 | 1 | <i>Alphaproteobacteria</i> | Clone BF2C07 (97.45) [JN820204]                   | Ferromanganese deposit                 | <i>Sphingomonas</i> sp. MTR-71 (96.25) [DQ898300]                         |
| Hyd-34 | 9 | <i>Alphaproteobacteria</i> | Clone B5 (99.09) [HQ697418]                       | Drinking water treatment               | <i>Rhodobacter</i> sp. TUT3732 (97.06) [AB251408]                         |
| Hyd-38 | 1 | <i>Flavobacteriia</i>      | Clone SGUS1259 (97.76) [FJ202110]                 | Montastraea faveolata kept in aquarium | <i>Fluviicola taffensis</i> DSM 16823                                     |
| Hyd-41 | 1 | <i>Armatimonadia</i>       | Clone MC20 (93.20) [JN868914]                     | Lake water                             | RW262 (91.88) [NR_041911]                                                 |
| Hyd-42 | 1 | <i>Flavobacteriia</i>      | Clone ATB-LH-7198 (97.22) [FJ535191]              | Water of carrot washing plant          | <i>Armatimonas rosea</i> (92.26) [AB529679]                               |
| Hyd-43 | 1 | <i>Betaproteobacteria</i>  | Clone 3.29h30 (98.40) [JN679082]                  | Membrane bioreactor                    | <i>Flavobacterium aquatile</i> DSM 1132 (96.94) [NR_042495]               |
| Hyd-45 | 2 | <i>Alphaproteobacteria</i> | Clone F0813 (100) [AF235997]                      | Genomic DNA                            | <i>Denitratisoma oestradiolicum</i> AcBE2-1 (91.97) [NR_043249]           |
| Hyd-48 | 2 | <i>Betaproteobacteria</i>  | <i>Acidovorax</i> sp. Van23 (99.26) [HQ222268]    | Vanillin enrichment culture            | <i>Sphingomonas</i> sp. PLS3 (97.25) [AJ620200]                           |
| Hyd-49 | 1 | <i>Betaproteobacteria</i>  | Uncultured bacterium 0317 (98.33) [AB286389]      | Activated sludge                       | Endosymbiont of <i>Nilaparvata lugens</i> M400 (98.86) [JQ975881]         |
| Hyd-51 | 1 | <i>Alphaproteobacteria</i> | Clone DUP6D09 (99.64) [HQ178928]                  | Sediment                               | Uncultured Rhodocyclaceae Amb_16S_876 (94.87) [EF018601]                  |
| Hyd-56 | 1 | <i>Betaproteobacteria</i>  | Clone JS05 (98.46) [JN869110]                     | Lake water                             | <i>Sphingomonas</i> sp. HTCC500 (98.39) [AY584571]                        |
| Hyd-57 | 2 | <i>Gammaproteobacteria</i> | Clone ncd1965g04c1 (99.41) [JF166553]             | Skin, volar forearm                    | <i>Leptothrix</i> sp. S1.1 (97.19) [DQ241397]                             |
| Hyd-58 | 1 | <i>Deinococci</i>          | Clone Alchichica_AL31_2_1B_168 (92.41) [JN825642] | Lake                                   | <i>Silanimonas</i> sp. AK13 (89.75) [HE573746]                            |
| Hyd-60 | 1 | <i>Betaproteobacteria</i>  | Clone 1H_31 (99.20) [AY546500]                    | Soda lake sediment                     | <i>Truepera radiovictrix</i> TU-8 (88.32) [DQ022077]                      |
| Hyd-66 | 1 | <i>Alphaproteobacteria</i> | Clone XZXXH70 (96.28) [EU703428]                  | Freshwater lake                        | <i>Methylophilus leisingeri</i> (95.34) [AB193725]                        |
| Hyd-67 | 1 | <i>Flavobacteriia</i>      | Bacterium SH1-3 (96.17) [JQ269247]                | Biofilm on antifouling paint-summer    | <i>Rhodobacter</i> sp. Cr5-50 (95.18) [GU441680]                          |
| Hyd-69 | 1 | <i>Deltaproteobacteria</i> | Clone A90 (93.24) [FJ660578]                      | Activated sludge                       | <i>Fluviicola taffensis</i> DSM 16823 (92.33) [NR_041911]                 |
| Hyd-72 | 1 | <i>Betaproteobacteria</i>  | Clone glb343c (92.85) [EU978831]                  | Glacier ice                            | Uncultured Polyangiaceae Amb_16S_1127 (90.95) [EF018495]                  |
|        |   |                            |                                                   |                                        | Uncultured Candidatus <i>Accumulibacter</i> sp. 4.6h71 (89.08) [JN679133] |

|         |   |                     |                                                           |                                      |                                                               |
|---------|---|---------------------|-----------------------------------------------------------|--------------------------------------|---------------------------------------------------------------|
| Hyd-73  | 1 | Gammaproteobacteria | Clone B04-06F(97.56) [FJ542988]                           | High ergovaline treatment gut        | Legionella sp. W10-070(86.21) [HE613855]                      |
| Hyd-74  | 1 | Flavobacteriia      | Clone 3C003394(97.63) [EU802008]                          | Chesapeake Bay, MD                   | Flavobacterium sp. MSY2(97.22) [DQ196345]                     |
| Hyd-78  | 3 | Betaproteobacteria  | Clone MACA-EFT44(96.67) [GQ500809]                        | Cave stream                          | Uncultured Methylothermobacter sp. sh-xj122(94.95) [JQ327997] |
| Hyd-79  | 9 | Betaproteobacteria  | Clone reservoir-137(99.74) [JF697518]                     | Stream of Dianchi Lake               | Curvibacter sp. IMCC12707(98.52) [JF715440]                   |
| Hyd-81  | 1 | Betaproteobacteria  | Beta proteobacterium A1004(95.83) [AF236009]              | Genomic DNA                          | Inhella inkyongensis IMCC1713(94.91) [NR_043920]              |
| Hyd-82  | 2 | Gammaproteobacteria | Cellvibrio sp. KY-YJ-1(98.66) [EF692634]                  | Genomic DNA                          | Cellvibrio fibrivorans R-4079(99.05) [NR_025420]              |
| Hyd-83  | 1 | Deltaproteobacteria | Clone FOOS7B_64(95.78) [EU431712]                         | Percolating waters                   | Bdellovibrio exovorans JSS(95.74) [EF687743]                  |
| Hyd-87  | 2 | Alphaproteobacteria | Uncultured Rhizobiales bacterium Sto3-1(95.43) [AY138237] | human stomach biopsy                 | Prosthecomicrobium hirschii ATCC:27832(94.63) [HM037994]      |
| Hyd-94  | 1 | Deltaproteobacteria | Clone fjc-58(98.81) [JQ278802]                            | Groundwater                          | Chondromyces pediculatus Cm p51(92.64) [GU207875]             |
| Hyd-97  | 1 | <b>Unaffiliated</b> | Clone V201-13(91.04) [HQ114028]                           | Biofilms in a full-scale vermifilter | Candidate division OP10(86.73) [GQ339893]                     |
| Hyd-99  | 1 | Alphaproteobacteria | Clone 14-95(99.15) [JF697347]                             | Stream of Dianchi Lake               | Rhodobacter sp. TUT3732(96.43) [AB251408]                     |
| Hyd-109 | 1 | Alphaproteobacteria | Clone MN03(98.18) [JN869015]                              | Lake water                           | Rhodobacter sp. Cr5-50(95.67) [GU441680]                      |
| Hyd-110 | 1 | Flavobacteriia      | Clone AGS-HB2-1(95.57) [HQ403245]                         | Aerobic granular sludge              | Wandonia haliotis Haldis-1(84.57) [FJ424814]                  |
| Hyd-113 | 1 | Alphaproteobacteria | Clone J52(96.61) [HQ697493]                               | Biologically activated carbon        | Hyphomicrobium sp. KC-IT-W2(95.57) [FJ711209]                 |
| Hyd-118 | 1 | Alphaproteobacteria | Clone: UTFS-OF08-d36-35(97.51) [AB200296]                 | Activated sludge                     | Sinorhizobium meliloti GR67(86.19) [HE805562]                 |
| Hyd-132 | 1 | Alphaproteobacteria | Asticcacaulis excentricus CB48(98.24) [CP002396]          | Pond water                           | Brevundimonas naejangsansensis HWG-A15(93.14) [JQ684238]      |
| Hyd-133 | 1 | Betaproteobacteria  | Clone 8-105(94.98) [JQ923988]                             | Drinking water distribution system   | Limnobacter thiooxidans CS-K2(94.79) [AJ289885]               |
| Hyd-140 | 1 | Flavobacteriia      | Flavobacterium succinicans DSM4001(99.25) [AM230494]      | Genomic DNA                          | Flavobacterium sp. WB4.3-96(97.41) [AM177633]                 |
| Hyd-141 | 1 | Gammaproteobacteria | Clone FGL7S_B125(99.66) [FJ437965]                        | Green Lake surface sediments         | Steroidobacter sp. ZUMI37(93.93) [AB548216]                   |
| Hyd-142 | 9 | Betaproteobacteria  | Clone S25_1448(95.85) [EF575104]                          | Coco's Island                        | Piscinibacter aquaticus IMCC1728(95.71) [NR_043921]           |
| Hyd-143 | 2 | Alphaproteobacteria | Clone: SWB04(97.86) [AB294315]                            | Stream                               | Novosphingobium sp.                                           |

|         |    |                     |                                                              |                                         |                                                                        |
|---------|----|---------------------|--------------------------------------------------------------|-----------------------------------------|------------------------------------------------------------------------|
|         |    |                     |                                                              |                                         | Van61 (84.40) [HQ222277]                                               |
| Hyd-145 | 4  | Betaproteobacteria  | Clone R15-71 (98.07) [JF808901]                              | Activated sludge                        | Methylobacillus<br>glycogenes<br>DSM5685T (95.62) [FR733701<br>]       |
| Hyd-148 | 1  | Cytophagia          | Clone MA-R29 (98.25) [JN038610]                              | Chongxi wetland<br>soil                 | Uncultured Flexibacter<br>sp.<br>EFT307_D08 (92.51) [GU2015<br>55]     |
| Hyd-152 | 1  | Gammaproteobacteria | Clone 2\SC\46 (96.89) [EU340183]                             | Aquatic<br>macrophytes                  | Dokdonella sp.<br>TSY06 (89.94) [AB663505]                             |
| wat1    | 1  | Alphaproteobacteria | Clone sdm114 (87.77) [JQ798469]                              | Decomposed maize<br>straw               | Rhizobium sp. PRNB-<br>25 (84.96) [HQ589028]                           |
| wat2    | 2  | Planctomycetia      | Uncultured Planctomyces sp.<br>Joinville4 (98.33) [FJ236055] | Drinking water                          | Planctomyces sp.<br>Schlesner<br>130 (87.06) [X81952]                  |
| wat5    | 13 | Betaproteobacteria  | Clone reservoir-<br>93 (99.73) [JF697474]                    | Stream of Dianchi<br>Lake               | Acidovorax sp. R-<br>24667 (99.60) [AM084010]                          |
| wat6    | 1  | Actinobacteria      | Clone D23 (99.19) [EU234313]                                 | Upstream of Wang<br>Yang River          | Uncultured<br>actinobacterium STH11-<br>15 (98.85) [DQ316377]          |
| wat7    | 1  | Sphingobacteriia    | Clone ZBAF-R4 (94.25) [HQ011389]                             | Biofilm in a<br>wastewater<br>treatment | Uncultured<br>Sphingobacteriia ADK-<br>MOe02-<br>08 (93.87) [EF520606] |
| wat8    | 1  | Alphaproteobacteria | Clone<br>FGL7S_B145 (93.59) [FJ437978]                       | Green Lake<br>surface sediments         | Uncultured alpha<br>proteobacterium<br>HB125 (92.32) [EF648106]        |
| wat10   | 2  | Deltaproteobacteria | Isolate<br>1112864242226 (99.54) [HQ120302]                  | Loamy sand                              | Phaselicystis flava<br>SBKo001 (87.98) [NR_044523<br>]                 |
| wat12   | 1  | Unaffiliated        | Clone S39 (99.19) [JF775633]                                 | Pond sediment                           | Uncultured Acidobacteria<br>bacterium<br>JH46 (94.78) [JQ861336]       |
| wat13   | 1  | Sphingobacteriia    | Clone sdm140 (98.38) [JQ798482]                              | Decomposed maize<br>straw buried        | Chitinophaga<br>ginsengisoli Gsoil<br>052 (87.36) [NR_041375]          |
| wat14   | 2  | Gammaproteobacteria | Uncultured Legionella<br>sp.2H7 (97.21) [HQ003528]           | Carrizo shallow<br>lake                 | Legionella sp.<br>LLAP11 (96.86) [X97362]                              |
| wat18   | 1  | Gammaproteobacteria | Clone<br>12TCLN056 (98.86) [AB636982]                        | Soil                                    | Cellvibrio gandavensis<br>R-4069 (99.19) [NR_025419]                   |
| wat19   | 1  | Flavobacteriia      | Clone SGUS1259 (97.47) [FJ202110]                            | Montastraea<br>faveolata                | Fluviicola sp. NBRC<br>101268 (93.52) [AB517714]                       |
| wat20   | 1  | Alphaproteobacteria | Clone BF2C07 (98.62) [JN820204]                              | Ferromanganese<br>deposit               | Sphingomonas sp.<br>D31C2 (95.18) [AY162145]                           |
| wat22   | 1  | Planctomycetia      | Uncultured Planctomycetales<br>(99.17) [JN825563]            | Lake                                    | Gemmata sp. Wal-<br>6 (99.16) [GQ889484]                               |
| wat24   | 1  | Betaproteobacteria  | Clone mv13.2 (98.80) [AY424823]                              | Genomic DNA                             | Methylotenera versatilis<br>301 (95.61) [CP002056]                     |
| wat26   | 3  | Actinobacteria      | Clone<br>AK4DE1_06E (97.04) [GQ397040]                       | Soil                                    | Iamia sp. T2-<br>YC6790 (94.56) [GQ369058]                             |

|       |   |                     |                                                          |                                       |                                                               |
|-------|---|---------------------|----------------------------------------------------------|---------------------------------------|---------------------------------------------------------------|
| wat27 | 3 | Alphaproteobacteria | Clone L65 (96.88) [EU834774]                             | Lab scale EBPR-activated sludge       | Rhodobium marinum C3 (89.41) [EU445270]                       |
| wat28 | 1 | Alphaproteobacteria | Clone C20 (96.64) [JQ323113]                             | Cooling water system                  | Rhodobacter sp. TCRI (95.26) [AB017799]                       |
| wat30 | 1 | Sphingobacteriia    | Clone BF2B08 (99.66) [JN820194]                          | Ferromanganese deposit                | Haliscomenobacter hydrossis DSM 1100 (98.78) [NR_042316]      |
| wat31 | 1 | Flavobacteriia      | Clone SINN629 (94.76) [HM128667]                         | Tanggulha Lake                        | Flavobacterium sp. 1-C-1 (84.97) [GU593613]                   |
| wat33 | 1 | Cytophagia          | Clone Dianchi-34 (98.84) [HQ324880]                      | Lake water                            | Leadbetterella byssophila DSM 17132 4M15 (93.24) [NR_043233]  |
| wat34 | 1 | Alphaproteobacteria | Uncultured Novosphingobium sp. fjc-77 (97.53) [JQ278820] | Groundwater                           | Novosphingobium naphthalenivorans TUT562 (96.22) [NR_041046]  |
| wat36 | 2 | Flavobacteriia      | Clone 3C003181 (97.24) [EU801804]                        | Chesapeake Bay, MD                    | Uncultured Fluviicola sp. XZXXH2 (96.98) [EU703456]           |
| wat37 | 1 | Unaffiliated        | Clone 654995 (91.06) [DQ404664]                          | Contaminated sediment                 | Tuber borchii symbiont b-17B0 (90.37) [AF070444]              |
| wat38 | 1 | Unaffiliated        | Uncultured candidate TM7 D116231C09 (97.08) [GU180006]   | Oil well                              | TM7 phylum sp. canine oral taxon 250 ZL096 (92.81) [JN713414] |
| wat43 | 1 | Alphaproteobacteria | Sphingopyxis sp. M2R2 (99.79) [EU188914]                 | PAH polluted site                     | Sphingopyxis chilensis R9-594 (99.58) [JQ660012]              |
| wat41 | 1 | Betaproteobacteria  | Clone 6'-72 (99.58) [JQ923814]                           | Drinking water distribution system    | Undibacterium sp. M4-14 (99.03) [HE616176]                    |
| wat44 | 1 | Alphaproteobacteria | Clone ncd2177c08c1 (99.16) [JF189806]                    | Skin, volar forearm                   | Devosia geojensis BD-c194 (87.97) [NR_044291]                 |
| wat45 | 1 | Alphaproteobacteria | Uncultured Rhodobacteraceae XZXXH70 (97.13) [EU703428]   | Freshwater lake                       | Rhodobacter sp. Cr5-50 (95.81) [GU441680]                     |
| wat46 | 1 | Alphaproteobacteria | Clone UTFS-OF08-d36-35 (98.13) [AB200296]                | Activated sludge                      | Micavibrio sp. EPC2 (86.06) [DQ186614]                        |
| wat48 | 1 | Unaffiliated        | Clone Run-SP58 (95.52) [AB247481]                        | Activated sludge                      | clone B1Q1E-91f-JRD28 (96.38) [JF917288]                      |
| wat50 | 3 | Flavobacteriia      | Clone M17-10-B17 (97.38) [JQ088393]                      | Crude oil reservoir                   | Flavobacteria bacterium KF030 (95.98) [AB269814]              |
| wat52 | 1 | Flavobacteriia      | Clone reservoir-60 (98.31) [JF697441]                    | Stream of Dianchi Lake                | Flavobacterium succinicans DSM 4002 (97.01) [NR_042498]       |
| wat53 | 8 | Sphingobacteriia    | Uncultured bacterium FukuS59 (94.13) [AJ290042]          | Genomic DNA                           | Uncultured Sphingobacteria ADK-MOe02-08 (92.99) [EF520606]    |
| wat54 | 1 | Verrucomicrobiae    | Uncultured Tolumonas sp. R40-25 (99.27) [JF808981]       | Activated sludge                      | Prostheco bacter vanneervanii 12252 (96.67) [AJ966883]        |
| wat59 | 1 | Sphingobacteriia    | Clone RS06101_B100 (96.97) [EU101214]                    | Frasassi sulfidic cave stream biofilm | clone TDNP_Wbc97_206_1_92 (92.75) [FJ517048]                  |



|       |   |                     |                                                                     |                                            |                                                                |
|-------|---|---------------------|---------------------------------------------------------------------|--------------------------------------------|----------------------------------------------------------------|
| wat62 | 1 | Flavobacteriia      | Clone SINN629(95.72) [HM128667]                                     | Tanggulha Lake                             | Flavobacterium sp. WB 4.4-22(84.45) [AM177636]                 |
| wat63 | 1 | Cytophagia          | Clone reservoir-107(99.66) [JF697488]                               | Stream of Dianchi Lake                     | Uncultured Arcicella sp. XZXXH12(99.39) [EU703452]             |
| wat64 | 3 | Verrucomicrobiae    | Uncultured bacterium Kas152B(98.80) [EF203197]                      | Sediment                                   | Luteolibacter sp. CCTCC AB 2010415(96.67) [JN630810]           |
| wat65 | 1 | Planctomycetia      | Pirellula sp. Schlesner 302(94.17) [X81942]                         | Genomic DNA                                | planctomycete str. 535(93.17) [AJ231176]                       |
| wat67 | 1 | Flavobacteriia      | Clone MC1_16S_47(94.44) [EU662615]                                  | Floating microbial mat from sulfidic water | Flavobacterium hercynium WB 4.2-33(93.95) [NR_042520]          |
| wat70 | 1 | Betaproteobacteria  | Uncultured bacterium FOOS7B_45(96.44) [EU431699]                    | Alcium carbonate muds                      | Herbaspirillum seropedicae Z67(96.12) [NR_029329]              |
| wat77 | 1 | Alphaproteobacteria | Clone 214(98.09) [JF828749]                                         | Waste water                                | Rickettsia heilongjiangii HLJ-054(93.52) [NR_041770]           |
| wat78 | 2 | Alphaproteobacteria | Clone MP104-SW-b24(97.79) [DQ088789]                                | Crustal biotome                            | Sphingomonas sp. EZ41(96.76) [EU591707]                        |
| wat79 | 1 | Cyanobacteria       | Uncultured Oscillatoriales cyanobacterium LI06st1(98.48) [JF733399] | Genomic DNA                                | Leptolyngbya sp. FYG(92.70) [FJ933259]                         |
| wat80 | 1 | Actinobacteria      | Uncultured actinobacterium LT1G10(99.66) [EU117848]                 | Lake epilimnion                            | Candidatus Planktophilia MWH-EgelM2-3.acI(99.66) [FJ428831]    |
| wat81 | 1 | Unaffiliated        | Clone A11(88.50) [HM773452]                                         | Food-wastewater treatment plant            | Uncultured candidate division TM7 E1B-B5-114(87.31) [EF016808] |
| wat83 | 1 | Gammaproteobacteria | Cellvibrio sp. KY-YJ-1(97.40) [EF692634]                            | Genomic DNA                                | Cellvibrio fibrivorans R-4079(97.75) [NR_025420]               |
| wat84 | 1 | Cyanobacteria       | Clone EpiNCA39(97.30) [FJ849099]                                    | Arctic stream epilithon                    | Oscillatoria sp. PCC 8927(90.12) [GQ351575]                    |
| wat87 | 1 | Alphaproteobacteria | Clone C-78(97.62) [HQ860594]                                        | Stream water                               | Rhodobacter sphaeroides 2.4.1(96.22) [NR_029215]               |
| wat91 | 1 | Betaproteobacteria  | Clone 2C228284(99.07) [EU800248]                                    | Delaware Bay, NJ                           | Uncultured Rhodocyclaceae Elev_16S_475(97.56) [EF019288]       |
| wat92 | 1 | Betaproteobacteria  | Clone 3C003675(99.40) [EU802237]                                    | Chesapeake Bay, MD                         | Uncultured Curvibacter sp. sh-xj128(99.06) [JQ327990]          |
| wat93 | 1 | Bacilli             | Uncultured bacterium, SRODG012(95.33) [FM995177]                    | Genomic DNA                                | Streptococcus suis S735(79.64) [NR_036918]                     |
| wat95 | 1 | Betaproteobacteria  | Clone VW-86(96.58) [FM994919]                                       | hot spring Mizinka                         | Curvibacter delicatus 146(96.95) [NR_028713]                   |
| wat97 | 1 | Unaffiliated        | Uncultured candidate Pav-SR4(98.37) [FJ482217]                      | Lake Pavin water column                    | Uncultured candidate B1Q1E-91f-E070(98.72) [JF917287]          |
| wat99 | 1 | Unaffiliated        | Uncultured Chloroflexi                                              | Volcano 1, South                           | Caldilineae bacterium                                          |

|        |   |                     |                                                         |                                              |                                                                   |
|--------|---|---------------------|---------------------------------------------------------|----------------------------------------------|-------------------------------------------------------------------|
|        |   |                     | V1B07b21 (89.28) [GU369915]                             | Tonga Arc.                                   | PRI<br>4131 (80.90) [JQ733906]                                    |
| wat103 | 2 | Unaffiliated        | Uncultured Chloroflexi MP-R51 (87.42) [JN038723]        | Chongxi wetland soil                         | Uncultured Chloroflexi P-R16 (85.40) [JN038805]                   |
| wat104 | 1 | Deltaproteobacteria | Clone ASB26 (86.53) [FJ947130]                          | Activated sludge                             | Geobacter thiogenes K1 (79.89) [NR_028775]                        |
| wat106 | 1 | Betaproteobacteria  | Clone MACA-EFT44 (96.74) [GQ500809]                     | Bio-Sep beads in base level cave stream      | Methylotenera versatilis 301 (95.22) [CP002056]                   |
| wat107 | 1 | Alphaproteobacteria | Clone TDNP_LSbc97_232_1_69 (86.88) [FJ516840]           | Lower sediment                               | Dichotomicrobium thermohalophilum DSM5002T (83.35) [FR733679]     |
| wat108 | 2 | Alphaproteobacteria | Alpha proteobacterium A0721 (99.51) [AF235998]          | Genomic DNA                                  | Rhizobium sp. Rb122 (96.82) [AB636290]                            |
| wat109 | 1 | Actinobacteria      | Clone OTU_22 (93.19) [EU083500]                         | Hexadecane-degrading denitrifying consortium | Uncultured actinobacterium FAC31 (91.75) [DQ451470]               |
| wat111 | 1 | Actinobacteria      | Clone thermophilic alkaline-17 (98.78) [GU455257]       | Anaerobic fermentation reactor               | Iamia sp. T2- YC6790 (93.86) [GQ369058]                           |
| wat113 | 1 | Unaffiliated        | Uncultured Chlorobi BLC04 (97.34) [JN820218]            | Ferromanganese deposit                       | Chlorobi bacterium canine oral taxon 046 1F061 (81.30) [JN713214] |
| wat116 | 2 | Unaffiliated        | Clone p22k16ok (96.31) [FJ478864]                       | Undisturbed tall grass prairie               | Uncultured candidate division MP-R126 (95.51) [JN038791]          |
| wat117 | 6 | Gammaproteobacteria | Vibrio parahaemolyticus RIMD 2210633 (99.67) [BA000031] | Genomic DNA                                  | Vibrio sp. SBP (99.47) [HQ123984]                                 |
| wat119 | 2 | Unaffiliated        | Clone a-86 (96.45) [JX040386]                           | Waste water                                  | GN02 bacterium canine oral taxon 291 ZR106 (82.82) [JN713458]     |
| wat120 | 2 | Betaproteobacteria  | Clone 6'-72 (99.33) [JQ923814]                          | Drinking water distribution system           | Herminiimonas arsenicoxydans ULPAs1 (95.46) [NR_043147]           |
| wat121 | 1 | Unaffiliated        | Uncultured candidate RB_31f (86.41) [EF123563]          | Black band diseased (BBD) coral tissues      | Uncultured candidate RII-TR069 (83.19) [JQ580302]                 |
| wat124 | 1 | Alphaproteobacteria | Clone PC0810_49 (96.56) [JN983651]                      | Genomic DNA                                  | Rhodobacter sp. CR07-62 (94.96) [EU979476]                        |
| wat125 | 1 | Alphaproteobacteria | Clone D-26 (96.08) [HQ860667]                           | Stream water                                 | Aquabacter spiritensis DSM9035T (89.23) [FR733686]                |
| wat126 | 1 | Bacilli             | Clone cpw3b516 (96.88) [HM921122]                       | Groundwater                                  | Pirellula sp. Schlesner 302 (92.25) [X81942]                      |
| wat127 | 1 | Gammaproteobacteria | Legionella sp. W10-070 (93.64) [HE613855]               | Water                                        | Legionella pneumophila Los Angelos-1 (93.37) [HQ287902]           |
| wat129 | 1 | Betaproteobacteria  | Clone DR136 (96.86) [JF429180]                          | Primary drinking water supply                | Uncultured Nitrosospira sp.                                       |

|        |   |                     |                                                        |                                       |                                                                    |
|--------|---|---------------------|--------------------------------------------------------|---------------------------------------|--------------------------------------------------------------------|
|        |   |                     |                                                        |                                       | Ba204 (93.86) [JQ684443]                                           |
| wat130 | 1 | Alphaproteobacteria | Clone T1-25 (98.75) [GQ487892]                         | Soil polluted by heavy metals         | <i>Devosia</i> sp. R-43964 (97.69) [FR691415]                      |
| wat139 | 1 | Betaproteobacteria  | Clone 3C003105 (99.53) [EU801741]                      | Chesapeake Bay, MD                    | <i>Polynucleobacter necessarius</i> MWH-LF2-54B (99.39) [AJ964893] |
| wat140 | 2 | Gammaproteobacteria | Clone KIST-JJY048 (91.15) [EF659421]                   | Suspended sludge from anammox reactor | <i>Legionella</i> sp. OUB41 (89.83) [AB058918]                     |
| wat141 | 1 | Sphingobacteriia    | <i>Flexibacter sancti</i> IFO 15057 (98.71) [AB078066] | Genomic DNA                           | <i>Chitinophaga sancti</i> IFO 15057 (98.71) [NR_040917]           |
| wat143 | 2 | Alphaproteobacteria | Clone: SWB04 (98.50) [AB294315]                        | Stream                                | <i>Novosphingobium hassiacum</i> W-51 (84.52) [NR_028962]          |
| wat145 | 2 | Gammaproteobacteria | Clone AW67 (99.39) [JN868837]                          | Lake water                            | <i>Pseudomonas</i> sp. N1 (98.99) [EU275166]                       |
| wat147 | 1 | Betaproteobacteria  | Clone 3C003190 (99.93) [EU801813]                      | Chesapeake Bay, MD                    | <i>Methylotenera versatilis</i> 301 (97.93) [CP002056]             |
| wat148 | 1 | Gammaproteobacteria | Clone AW55 (98.87) [JN868834]                          | Lake water                            | <i>Silanimonas</i> sp. AK13 (95.17) [HE573746]                     |
| wat149 | 1 | Sphingobacteriia    | <i>Chitinophaga</i> sp. SaZS3 (99.73) [JQ806450]       | Genomic DNA                           | <i>Flexibacter sancti</i> :IFO 16034 (98.57) [AB078068]            |
